1           **The Impact of Early Life Stress on the Genetic Influence on**  
2           **Brain and Cognitive Development in Children**

3           **Running title: ELS alters the genetic pathway to the brain and cognitive**  
4           **development**

5           Hee-Hwan Wang<sup>1\*</sup>, Seo-Yoon Moon<sup>2\*</sup>, Hyun-Jin Kim<sup>3</sup>, KaKyeong Kim<sup>1</sup>,  
6           Woo-Young Ahn<sup>3</sup>, Yoonjung Yoonie Joo<sup>4</sup>, Jiook Cha<sup>3, 5</sup>

- 7
- 8           1. Department of Brain Cognitive and Science, Seoul National University, Seoul, Korea
  - 9           08825
  - 10          2. College of Liberal Studies, Seoul National University, Seoul, Korea 08825
  - 11          3. Department of Psychology, Seoul National University, Seoul, Korea 08825
  - 12          4. Institute of Data Science, Korea University, Seoul, Korea, 02841
  - 13          5. AI Institute, Seoul National University, Seoul, Korea, 08825
- 14          (\* denotes equal contribution)

15

16           **Correspondence to:**

17           Yoonjung Yoonie Joo, PhD  
18           201c, International Center for Converging Technology  
19           145 Anam-ro, Seongbuk-gu, Seoul, Republic of Korea, 02841  
20           yoonjungjoo@korea.ac.kr  
21           Office: +82-2-3290-4646

22

23           Jiook Cha, PhD  
24           Gwanak-ro 1, Building #16, Suite M512  
25           Gwanak-gu, Seoul, Republic of Korea  
26           [connectome@snu.ac.kr](mailto:connectome@snu.ac.kr)  
27           Office: +82-2-880-8618

28

29           **Keywords:** genes-brain-cognition, Early Life Stress (ELS), moderated mediation,  
30           path modeling, genome-wide polygenic scores (GPS)

31           **Abstract**

32           Early life stress (ELS), such as *abuse*, neglect, and maltreatment, is a well-known  
33 risk factor for mental illness. However, it is unclear how ELS affects the brain and cognitive  
34 development. Identifying specific relationships of ELS with the genetic and brain-related  
35 underpinnings of cognitive development may reveal biological mechanisms responsible for  
36 the negative impact of ELS and those that lead to individual differences in sensitivity (or  
37 resilience) to ELS. In this study, to investigate the interlinked processes of cognitive  
38 development, we analyzed the multimodal data of DNA genotypes, brain imaging (MRI), and  
39 neuropsychological assessment (NIH Toolbox) outcomes of 4,276 children (ages 9 to 10  
40 years, European ancestry) from the Adolescent Brain Cognitive Development (ABCD) study.  
41 We estimated the genetic influence on cognitive capacity using genome-wide polygenic  
42 scores (GPSs). Our regression and mediation analyses revealed significant causal  
43 relationships for the gene-brain-cognition pathway: Brain structural development significantly  
44 mediated the genetic influence on cognitive development (*partial mediation effect* = 0.016,  
45  $P_{FWE} < 0.001$ ). Interestingly, within the triangular relationship, we found a significant  
46 moderation effect of *abuse* only on the gene-to-brain pathway (*Index of Moderated*  
47 *Mediation* = -0.007; 95% CI = -0.012 ~ -0.002;  $P_{FWE} < 0.05$ ). These findings indicate the  
48 negative modulatory effects of ELS on the genetic influence on brain structural development  
49 that lead to disadvantageous neurocognitive development in prepubertal children.

50

51

## 52 Introduction

53 Early life stress (ELS), such as *abuse* and *neglect*, is a well-known major risk factor  
54 for maladaptive cognition, behaviors, and psychiatric disorders<sup>1-4</sup> with long-term sequelae<sup>5</sup>.  
55 ELS modulates the expression of the genes responsible for stress physiology, emotion  
56 regulation, cognitive control, and learning and memory<sup>6-9,10</sup>. Animal literature shows a causal  
57 effect of ELS on cognition and behaviors<sup>11-20</sup> and the epi-/genetic mechanisms within the  
58 brain<sup>21-24</sup>. In humans, similar mechanisms may be involved in psychopathology<sup>25,26</sup>, stress  
59 physiology<sup>7</sup>, or emotion regulation<sup>27-29</sup>.

60 Although extensive literature shows associations of ELS with poor cognitive  
61 outcomes and brain functional and structural representations<sup>1,3,8</sup>, exactly how ELS affects  
62 cognitive capacity in humans remains unclear. Moreover, the impact of ELS on the  
63 development of the brain and cognition in children remains unknown. Addressing these  
64 questions will provide much-needed insight into who, when, and where to intervene  
65 regarding the negative neurocognitive outcomes of ELS. Considering the well-known impact  
66 of ELS on cognition<sup>3,10</sup>, we hypothesize that ELS is likely to modulate genetic influences on  
67 brain development as well as cognitive development<sup>3,5</sup>.

68 Cognitive development involves multiple dynamic processes that are regulated by the  
69 complex interplay of genetic and environmental factors<sup>30-32</sup>. Despite its significant impact,  
70 however, less is known about the biological mechanisms of how early environmental factors  
71 such as ELS, interact with genetic influences and impact cognitive development in children.  
72 The recent development of the genome-wide polygenic score approach (GPS) allows  
73 individual genetic loadings for cognitive capacity (e.g., accounting for up to 13% of the  
74 variance in cognitive outcomes in adults<sup>33</sup>) to be estimated quantitatively. Using this rigorous  
75 computational approach, we aimed to test whether ELS modulates the gene-brain-cognition  
76 development process.

77            This study had two main questions. First, does a gene-brain-cognition pathway exist  
78            during developmental periods? If so, does ELS negatively affect the causal pathway?  
79            We investigated these questions using multimodal data, including genetics, brain  
80            imaging, psychological data, and cognitive testing in large samples of prepubertal  
81            children (ages 9 to 10 years) with a wide range of sociodemographic characteristics.

## 82            **Methods**

### 83            **Study Participants**

84            Participants were enrolled in the Adolescent Brain Cognitive Development (ABCD)  
85            study, an ongoing longitudinal multisite study of brain development and health of youth in the  
86            United States. We used the deidentified neuroimaging, demographic, genetic, and  
87            behavioral data from the ABCD 2.0 Data Release<sup>34</sup>, these data were collected across 21  
88            sites from 2015 to 2018. The participants were 11,875 children from the U.S. who were aged  
89            9-10 years<sup>35</sup>. After removing participants who had at least one missing value from genetic,  
90            neuroimaging, and ELS data, 4,276 participants were included in our analyses.

91

### 92            **Genotype data for Genome-wide polygenic scores (GPS)**

93            Saliva samples were collected from study participants and were genotyped using the  
94            Affymetrix NIDA Smokescreen array (733,293 SNPs) at the Rutgers University Cell and DNA  
95            Repository. We removed any inferiorly genotyped SNPs with thresholds of (i) genotype call  
96            rate<95%, (ii) sample call rate<95%, and (iii) rare variants with minor allele frequency  
97            (MAF)<1%. We imputed the data using the Michigan Imputation Server<sup>36</sup> based on the 1000  
98            Genome phase 3 reference panel with Eagle ver2.4 phased output<sup>37</sup>. For the imputed  
99            12,046,090 SNPs, we additionally removed data from any individuals with >5% missing  
100            genotypes; extreme heterozygosity (F coefficient > 3 standard deviation from the population  
101            mean); and SNPs with <0.4 imputation INFO score, >5% missingness rate, <1% MAF and  
102            Hardy-Weinberg equilibrium ( $p < 10^{-6}$ ). Genetic ancestry was determined with the  
103            fastSTRUCTURE algorithm<sup>38</sup>, available from ABCD release 3.0. Our analysis was restricted  
104            to individuals with European ancestry to control for population stratification. We estimated  
105            both kinship coefficients (K.C.s) and principal components (P.C.s) to control familial

106 relatedness and ancestry admixture using PC-Air<sup>39</sup> and PC-Relate<sup>40</sup>. We selected unrelated  
107 samples that were inferred to be more distant than 4th-degree relatives ( $K.C.>0.022$ ) and  
108 removed any genetic outliers that fell significantly outside ( $>6$  S.D. limits) the center in P.C.  
109 space. In the rest of this paper, we used genotype data (11,301,999 variants) of 8,523  
110 unrelated European samples after Q.C., and the first ten ancestrally informative P.C.s were  
111 used as covariates in all the reported analyses (**Supplementary Figure 1**).

112 To assess the subject-level genetic propensity for cognitive ability, we computed  
113 genome-wide polygenic scores (GPS) for cognitive performance (CP) and educational  
114 attainment (EA) using publicly available GWAS summary statistics based on the European  
115 population<sup>30</sup>. The GPSs were constructed using PRSice2<sup>41</sup>, adjusting for the first ten  
116 principal components (P.C.s) of the genotype data to control for population stratification.

117

## 118 **Brain Imaging-Anatomical Imaging**

119 T1-weighted (T1w) 3D structural MRI images were acquired in the ABCD study. We  
120 processed the images following established protocols<sup>42,43</sup>: The gradient nonlinearity  
121 distortion correction method was performed on structural MRI scans to improve geometric  
122 accuracy and image intensity reproducibility<sup>44</sup>. Based on tissue segmentation and sparse  
123 spatial smoothing, intensity nonuniformity was corrected. Then, the data were then  
124 resampled with 1 mm isotropic voxels into rigid alignment with an atlas-derived brain.

125 Cortical surface reconstruction was applied using the following procedures: structural  
126 MRI scans were processed using FreeSurfer v6.0 (<https://surfer.nmr.mgh.harvard.edu>) for  
127 cortical surface reconstruction<sup>45</sup>, which includes skull-stripping<sup>46</sup>, white matter segmentation  
128 and initial mesh creation<sup>45</sup>, correction of topological defects, surface optimization<sup>47,48</sup>, and  
129 nonlinear registration to a spherical surface-based atlas<sup>49</sup>.

## 130 **Brain Imaging-Diffusion Spectrum Imaging**

131 We used the diffusion spectrum images from the ABCD study that were  
132 preprocessed using the following protocol<sup>50</sup> by the ABCD Data Analysis and Informatics  
133 Center (DAIC). Eddy current distortion correction was used with a nonlinear estimation using  
134 diffusion gradient orientations and amplitudes to predict the pattern of distortion<sup>51</sup>. Head  
135 motion was corrected by registering images synthesized from tensor fit<sup>52</sup>. Diffusion gradients  
136 were adjusted for head rotation<sup>52,53</sup>. To identify and replace dark slices due to abrupt head  
137 motion, we used robust diffusion tensor estimation<sup>54</sup>. B0 distortion was corrected with the  
138 reversing gradient method<sup>55</sup>. Gradient nonlinearity distortion correction was applied<sup>44</sup>. The  
139 data were resampled to a standard orientation with an isotropic resolution of 1.5 mm.

140 To estimate accurate brain imaging phenotypes, we used individual connectome data.  
141 We applied MRtrix3<sup>56</sup> for whole-brain white matter tract estimation and individualized  
142 connectome generation. For connectivity metrics, we used streamline counts associated with  
143 fiber connection strength<sup>57,58</sup> associated with fiber integrity. We decreased noise<sup>59</sup>, and  
144 performed bias correction with the Advanced Normalization Tools (ANTs) pipeline's N4  
145 algorithm<sup>60</sup>. To obtain a connectivity index with a white matter pathway<sup>61</sup>, we performed  
146 probabilistic tractography by second-order integration over fiber orientation distributions<sup>62</sup>,  
147 with random seeding across the brain and target streamline counts of 20 million. These initial  
148 tractograms were filtered from preliminary tractograms using spherical-deconvolution  
149 informed filtering (2:1 ratio). With a final streamline count of 10 million, we generated an 84 x  
150 84 whole-brain connectome matrix for each participant using the T1-based parcellation and  
151 segmentation in FreeSurfer. This pipeline ensured that individual participants' connectomes  
152 were restricted to their own neuroanatomy. We carried out the computation on the  
153 supercomputers at Argonne Leadership Computing Facility Theta and Texas Advanced  
154 Computing Center Stampede2.

## 155            **Dimensionality reduction of brain data**

156            To extract brain morphometric representations correlated with genetic influence on  
157 intelligence, we first performed generalized linear model analysis using cognitive capacity  
158 GPSs as independent variables and neuroimaging data as dependent variables adjusted to  
159 covariates (e.g., age, sex, maternal education, income, BMI, study site, and marital status).  
160 Among three different types of neuroimaging data (structural MRI, DTI-count, and DTI-FA),  
161 only brain morphometric features (i.e., structural MRI) showed significant associations with  
162 cognitive capacity GPSs ( $P_{FWE} < 0.05$ ; **Figure 3, Supplementary Figure 2, Supplementary**  
163 **Table 1**)<sup>63</sup>. We then performed principal component analysis to extract representations from  
164 brain morphological features associated with CP GPS or EA GPS (R version 3.4.1). We  
165 used the first principal components as representations of the brain.

166

## 167            **NIH Toolbox Cognition Battery data**

168            NIH Toolbox Cognitive Function Tests<sup>64</sup> were used to assess various levels of  
169 general cognitive ability of the participants. For each child, summary scores from the NIH  
170 Toolbox Cognition Battery were provided, including the crystallized intelligence composite  
171 score (mainly measuring prior learning and past experiences about language), the fluid  
172 intelligence composite score (mainly measuring abstract reasoning and learning ability in  
173 novel situations), and total intelligence composite score, which is the combination of both  
174 crystallized and fluid intelligence composite scores<sup>65,66</sup>. The crystallized intelligence  
175 composite score is a composite of the *Picture Vocabulary Test* and the *Oral Reading*  
176 *Recognition Test* outcomes, and the fluid intelligence composite score is a composite of the  
177 *Dimensional Change Card Sort Test*, the *Flanker Inhibitory Control and Attention Test*, the  
178 *Picture Sequence Memory Test*, the *List Sorting Working Memory Test*, and the *Pattern*



179 *Comparison Processing Speed Test* outcomes. Total intelligence composite score is a  
180 representation of general intelligence and is an aggregation of all the tests<sup>67</sup>.

181

## 182 **Early life stress**

183 We derived ELS measures based on child exposure domains in the ABCD study<sup>68</sup>  
184 (**Supplementary Table 2**). ELS measures were divided into three main categories:  
185 *household challenges, neglect, and abuse*. Subcategories of ELS data were as follows:  
186 *parental separation or divorce, criminal household member, household substance abuse,*  
187 *mental illness in household, mother treated violently in household challenges, emotional*  
188 *neglect, physical neglect in neglect, and physical abuse and sexual abuse in abuse*. We  
189 extracted the items of each subscale from the following various measurement tools  
190 (participant- or parent-reported): ABCD Family Environment Scale-Family Conflict Subscale  
191 Modified from PhenX, ABCD Diagnostic Interview for DSM-5 Traumatic Events, ABCD  
192 Family History Assessment, ABCD Parent Demographics Survey, ABCD Children's Report  
193 of Parental Behavioral Inventory, and ABCD Parental Monitoring Survey. We averaged the  
194 measurements for each subcategory and transformed them into z scores. The higher the  
195 score, the more stressful experiences children had.

196

## 197 **Statistical Analysis**

198 We performed a generalized linear model for three types of relationships — GPS-  
199 brain, GPS-intelligence composite scores, and brain-intelligence composite scores. We  
200 included the following covariates into those models: age, sex, maternal education, parental  
201 income, BMI, study site, and marital status. Family ID was not included because our analysis  
202 was performed in the dataset of unrelated individuals after excluding any relatives fourth-

203 degree or closer during the genetic QC process. We used familywise error (i.e., Bonferroni  
204 correction) in each type of relationship for multiple comparison corrections.

205 For path modeling, we first tested an initial mediation model (**Figure 1-a**) to check  
206 whether the key relationship of the GPS-brain-cognition pathway was significant. Before  
207 examining the role of ELS in the GPS-brain-cognition pathway, we tested whether ELS  
208 directly affects cognition and whether ELS moderates the gene-cognition pathway (**Figure 1-**  
209 **b**). After we determined the potential moderation effect of ELS on the GPS-brain-cognition  
210 pathway, we evaluated the first-stage moderated mediation models and the second-stage  
211 moderated mediation models, following the framework of moderated mediation analysis<sup>69-71</sup>.  
212 These models assessed how ELS and its interaction with genetics or the brain, would affect  
213 the triangular pathway. We repeated the analyses with different subtypes of ELS and  
214 compared their effects.

215 Mediation and moderated mediation analyses were performed in R environment  
216 v3.4.1 using the *lavaan* v0.6-7 package with 1000 bootstrapping replicates. Mediation  
217 models included the same covariates that were used in the regression model. *Parental*  
218 *separation or divorce* had to be excluded in a moderated mediation model because of model  
219 convergence issues.

220

## 221           **Results**

### 222           **Participants**

223           After quality control, our study cohort comprised 4,276 unrelated children of  
224           European ancestry with a mean age of 9-10 years from the ABCD study<sup>35</sup>. **The** demographic  
225           characteristics of the patients, stratified by records of ELS experience, are summarized in  
226           **Table 1 (Supplementary Table 3) and Figure 2**. All covariates, except for BMI, showed  
227           significant differences in experience with one or more type of ELS (*abuse:  $P < 0.001$ , neglect:*  
228            *$P < 0.05$ , and household challenges:  $P < 0.05$* ) (**Supplementary Table 4**).

229

### 230           **Correlation among GPS, Brain, and Intelligence**

#### 231           **Cognitive Capacity GPS-Brain**

232           Out of 992 brain morphometric features, 169 and 44 brain features correlated  
233           significantly with CP GPS ( $P_{FWE} < 0.05$ ) and EA GPS, respectively ( $P_{FWE} < 0.05$ ), when  
234           adjusted for age, sex, maternal education, income, BMI, study site, and marital status  
235           (**Figure 3**). Of note, global brain features — including total gray matter volume, total cortex  
236           volume, subcortical gray matter volume, and total cerebral white matter volume — were  
237           shown to have significant associations with both GPSs (**Supplementary Table 1**). White  
238           matter fiber counts and fractional anisotropy of the structural connectomes showed no  
239           significant correlations with either GPS (**Supplementary Figure 2**). To obtain cognitive  
240           capacity GPS-related brain representations, we linearly reduced the dimensionality of brain  
241           morphometric features correlated with each GPS by performing principal component  
242           analysis. We verified that only the first components substantially explained the variance of  
243           each GPS-related brain morphometric feature (Brain<sub>CP GPS</sub>: 44.5%; Brain<sub>EA GPS</sub>: 54.9%)

244 (Supplementary Figure 3, 4, 5) and were significantly correlated with cognitive capacity  
245 GPS (Brain CP GPS:  $\beta = 0.10$ ,  $P_{FWE} < 0.001$ ; Brain EA GPS:  $\beta = 0.15$ ,  $P_{FWE} < 0.001$ )  
246 (Supplementary Table 5).

247

#### 248 Brain-Intelligence Composite Score

249 Both Brain CP GPS and Brain EA GPS were significantly correlated with all three types  
250 of intelligence composite scores ( $P_{FWE} < 0.001$ ). Among the different types of intelligence  
251 composite scores, both brain representations showed the highest effect size on crystallized  
252 intelligence composite scores (Brain CP GPS:  $\beta = 0.18$ ; Brain EA GPS:  $\beta = 0.18$ ), with the  
253 lowest effect size on fluid intelligence composite scores (Brain CP GPS:  $\beta = 0.05$ ; Brain EA  
254 GPS:  $\beta = 0.05$ ). Total intelligence composite score was moderately correlated with brain  
255 representations (Brain CP GPS:  $\beta = 0.12$ ; Brain EA GPS:  $\beta = 0.12$ ) (Supplementary Table 6).

256

#### 257 GPS-Intelligence Composite Score

258 Both CP and EA GPS were significantly correlated with the outcomes of all three of  
259 the different types of intelligence measures ( $P_{FWE} < 0.05$ ). Test statistics showed that  
260 composite scores of crystallized intelligence appeared to have the strongest associations  
261 with both GPSs (CP GPS:  $\beta = 0.17$ ; EA GPS:  $\beta = 0.15$ ), followed by total intelligence  
262 composite scores (CP GPS:  $\beta = 0.14$ ; EA GPS:  $\beta = 0.10$ ) and the fluid intelligence  
263 composite score (CP GPS:  $\beta = 0.09$ ; EA GPS:  $\beta = 0.05$ ) (Supplementary Table 6).

264

265

## Mediation Analysis

266

267

268

269

270

271

272

273

274

275

276

277

278

279

280

## Path Analysis: Moderated Mediation effect of ELS

281

282

283

Our analysis of the GPS-brain-cognition pathway (**Figure 1-a**) showed that the brain morphometric representations significantly mediated the causal effect of both GPSs on all types of intelligence ( $P_{FWE} < 0.001$ ). Both GPSs showed the strongest direct effect on crystallized intelligence composite scores ( $\beta$  direct effect of CP GPS = 0.15;  $\beta$  direct effect of EA GPS = 0.13) compared to that on fluid intelligence composite scores ( $\beta$  direct effect of CP GPS = 0.09;  $\beta$  direct effect of EA GPS = 0.04) and total intelligence composite scores ( $\beta$  direct effect of CP GPS = 0.13;  $\beta$  direct effect of EA GPS = 0.09). Both GPSs also showed the strongest indirect effect size on crystallized intelligence composite scores, which were determined by brain morphometric representation ( $\beta$  indirect effect of CP GPS = 0.016;  $\beta$  indirect effect of EA GPS = 0.016), compared to fluid intelligence composite scores ( $\beta$  indirect effect of CP GPS = 0.004;  $\beta$  indirect effect of EA GPS = 0.005) and total intelligence composite scores ( $\beta$  indirect effect of CP GPS = 0.010;  $\beta$  indirect effect of EA GPS = 0.010) (**Table 2, Supplementary Table 7, Figure 4**).

Prior to moderated mediation analysis, we first assessed the correlation between ELS and intelligence composite scores and the evaluated the moderation effects of ELS on the relationship between cognitive capacity GPSs and intelligence composite scores (**Figure**

284 **1-b)**. Among the different types of ELS, only *neglect* showed significant correlations with all  
285 types of intelligence composite scores (**Supplementary Table 8**). In moderation analysis, no  
286 significant moderation effects of the ELS variables were detected ( $P_{FWE} > 0.05$ )  
287 (**Supplementary Table 9**).

288 The following first-stage moderated mediation analysis (**Figure 1-c**) showed the  
289 significant negative moderation effect of *abuse* on the EA GPS-brain-intelligence composite  
290 score relationship. Notably, *abuse* itself did not affect EA GPS-related brain morphometric  
291 representation; however, the interaction between EA GPS and *abuse* showed a significant  
292 negative association with brain morphometric representation ( $\beta = -0.04$ , **95% CI** =  $-0.07 \sim -$   
293  $0.014$ ,  $P_{FWE} < 0.05$ ). Among the different kinds of intelligence composite scores, crystallized  
294 intelligence composite scores were the most severely affected by the interplay of ELS and  
295 cognitive capacity GPSs through the brain (***Index of Moderated Mediation Crystallized***  
296 ***Intelligence Score*** =  $-0.007$ , **95% CI** =  $-0.012 \sim -0.002$ ;  $P_{FWE} < 0.05$ ) compared to the effect on  
297 fluid intelligence composite scores (***Index of Moderated Mediation Fluid Intelligence Score*** =  $-$   
298  $0.002$ , **95% CI** =  $-0.004 \sim 0.0$ ;  $P_{FWE} < 0.01$ ) and total intelligence composite scores (***Index of***  
299 ***Moderated Mediation Total Intelligence Score*** =  $-0.005$ , **95% CI** =  $-0.009 \sim -0.002$ ;  $P_{FWE} <$   
300  $0.01$ ) (**Table 3, Supplementary Table 10**). In the second-stage moderated mediation  
301 models (**Figure 1-d**), we found no significant interactions between the brain and ELS on  
302 intelligence composite scores (**Supplementary Table 11**). Taken together, the negative  
303 moderation effects of *abuse* on the causal pathway between genetic and phenotypic  
304 intelligence were only observed when the brain served as a mediator. The moderated  
305 mediation effect was only significant for *abuse*, but not for other ELS variables, even in  
306 subscales (**Supplementary Tables 12, 13**).

307

308

309

## Discussion

310 By leveraging the multimodal genetic, neuroimaging, and cognitive assessment data  
311 of 4,267 children of European ancestry, we examined the complex interplay among brain  
312 structure and genomic influence on cognitive development and how ELS affects the gene-  
313 brain-cognition triad. Our analysis reveals likely causal neurodevelopment pathways under  
314 the genetic control of intelligence and ELS modulation. We found that brain structural  
315 development partially mediates the genomic contributions to cognitive development in young  
316 children. Of note, ELS (*abuse*) specifically modulates the influence of cognitive capacity  
317 GPSs on the brain, this modulatory effect then affects cognition. These results show the  
318 potential causal relationships between ELS (*abuse*) and the genetic pathway for  
319 neurocognitive development, accounting for biological how it may lead to cognitive deficits in  
320 children.

321 Extending the existing literature reporting the influence of genetics on the brain and  
322 cognition<sup>3,72-77</sup>, our study shows a more specific multifactorial model in which brain structural  
323 development mediates the genetic impact on cognitive development. Of note, this study  
324 shows that the association of the cognitive capacity GPS was only significant with gray  
325 matter phenotypes but not with white matter phenotypes. This result may be related to the  
326 developmental characteristics observed during preadolescence (9 to 10 years old), i.e.,  
327 marked changes in gray matter, followed by relatively greater white matter changes or  
328 myelination<sup>78</sup>. Additionally, the brain mediation effect may be widespread involving several  
329 brain regions, considering that the brain mediator was the first principal component derived  
330 from hundreds of brain morphological features. Future research should examine how genetic  
331 influence is linked to longitudinal changes in brain structure over one's lifetime.

332 The key contribution of this study to the literature is the discovery that ELS modulates  
333 the magnitude of the impact of genomic influence on neurocognitive development. This

334 finding may account for a potential mechanism of the long-term effect of ELS on cognitive  
335 deficits. Note that our brain imaging results shows that ELS modulated the genomic  
336 influence on the cortical morphology of the various brain regions responsible for cognition  
337 and intelligence. In addition to the literature documenting the impact of ELS on affective  
338 processing, stress physiology and the relevant brain system<sup>3,72-77</sup>, this finding shows that  
339 ELS impacts cognitive brain circuitry.

340 Our moderated mediation results support genetic differential susceptibility to ELS.  
341 The genetic differential susceptibility model proposes that genetic variations of individuals  
342 regulate sensitivity or susceptibility to environmental influences<sup>79-81</sup>. In our analysis, as a  
343 result of the ELS moderation effects on the gene-to-brain pathway, children with the same  
344 level of ELS showed different cognitive outcomes depending on the magnitude of the EA  
345 GPS. That is, a child with a higher EA GPS showed a greater negative impact of ELS on the  
346 cognitive outcome, whereas one with a lower EA GPS showed a smaller negative impact.  
347 Perhaps, in the case of individual with a high GPS, ELS may negatively regulate the  
348 expression of the genes responsible for the brain and cognitive development (sequentially as  
349 supported in our model). Consequently, otherwise, positive effects of high GPSs on cognitive  
350 outcomes may be eliminated under the effect of ELS, resulting in lower cognitive outcomes  
351 compared with the individuals with high GPSs and no ELS. A crucial outstanding question is  
352 whether this modulatory effect of ELS on the cognitive capacity GPS is linked to epigenetics.  
353 Animal research shows that ELS induces epigenetic modification in DNA methylation sites  
354 that are associated with a wide array of neural events, such as neurotransmitter biosynthesis,  
355 neurological system processes, glial cell proliferation, neurogenesis in the hippocampus,  
356 neural migration in the cerebral cortex, neuroplasticity, and neurodevelopmental delay<sup>82-84</sup>;  
357 many of these events are critically related to cognitive development. This line of research  
358 may allow precise risk stratification and the development of more individualized intervention  
359 strategies.



360 Another novel aspect of this study was the application of the GPS approach, rather  
361 than focusing on selected common variants of DNA, which permitted integrative assessment  
362 of the polygenic contribution to cognitive development and revealed its impact on the wide  
363 array of brain circuits. A recent study reported a similar finding of the association between  
364 cognitive capacity GPS and brain volumes in adult samples in the UK Biobank<sup>73</sup>. Our study  
365 showed that the gene-brain-cognition relationship manifests as early as preadolescence.

366 Our observations suggested that *physical or sexual abuse* significantly modulates the  
367 "gene-to-brain" path, which then leads to "cognition" but not the "gene-to-cognition" path.  
368 This finding is in line with previous ELS studies reporting that *physical neglect* and *abuse*  
369 negatively impact genetic regulation of brain systems, such as hippocampal glucocorticoid  
370 receptors, neurogenesis, and regulation of brain development<sup>6,7,9,82</sup>.

371 The direct effect of cognitive capacity GPSs on cognition was tenfold larger in  
372 magnitude than the indirect effects on the brain. Note that the gray matter representations  
373 derived from ROI-level morphometry may only partially account for the gene-to-brain effects.  
374 Indeed, a morphometric analysis may not fully detect subtle changes in the brain tissues  
375 under the control of epigenetic (or any other environmental) mechanisms, such as  
376 vascularization, neurogenesis, and synaptogenesis. Future research may elucidate sensitive  
377 brain representations related to genetic influence and environmental modulation.

378 Another possible explanation of the small indirect effect on the brain may be related  
379 to the limitations of linear models in testing complex nonlinear relationships. We used PCA  
380 to extract the brain representation (i.e., principal components) from thousands of brain  
381 morphometric variables. We used this method for the ease of statistical modeling (mediation  
382 analysis); however, since this method uses a linear and orthogonal transformation of data,  
383 we admit that this representation might be too simplistic to capture nonlinear relationships  
384 among the brain variables.

385 Our study showed the utility of our multitrait (cognitive performance and educational  
386 attainment) genomic approach for revealing the different patterns of genetic influences on  
387 the brain and cognition. Years of education (educational attainment, EA) is a widely used  
388 proxy for an intelligence phenotype. This is because of its high genetic correlation with  
389 intelligence and the ease of assessment compared to an evaluation of cognitive ability that  
390 would require behavioral tests (hence, it is unfavorable in large GWASs). For example, the  
391 literature shows that EA GPS correlates with cognitive functioning<sup>85</sup> and the development of  
392 behaviors<sup>86</sup>.

393 Although both cognitive capacity GPSs showed significant effects on the gene-brain-  
394 cognition pathway, only EA GPS showed a significant modulatory effect of ELS on the  
395 pathway; CP GPS did not have a notable effect on the pathway. This observed ELS effect  
396 on EA GPS may be related to genetic loading not only for cognitive capacity but also for  
397 noncognitive skills and traits required for successful education attainment<sup>87</sup>. On the other  
398 hand, CP GPS correlated with a greater number of brain morphometric features than EA  
399 GPS did. This may reflect that CP GPS represents the genetic influence primarily on  
400 biological processes (i.e., brain development) directly linked to cognitive performance, but  
401 not so much on noncognitive processes. These points may be used to guide to future  
402 studies examining the gene-environment interaction in cognitive development.

403 Our results indicated greater magnitudes of the genetic influence on crystallized  
404 intelligence than on fluid intelligence during development. Crystallized intelligence is the  
405 ability to apply prior knowledge to problem solving; fluid intelligence is the ability to reason in  
406 novel situations without prior knowledge<sup>65,88,89</sup>. Since the genetic influence (both direct and  
407 indirect) was up to three times larger on crystallized intelligence compared to that on fluid  
408 intelligence, the impact of ELS via the gene-brain pathway was proportionally greater on  
409 crystallized intelligence than on fluid intelligence. This result adds granularity regarding the  
410 specificity of ELS impacts.

411 A few limitations of the study should be noted. First, it was not within the scope of this  
412 study to examine brain function, which is influenced by ELS through the triangular  
413 relationship. It is well known that ELS leads to changes in brain function<sup>3,8</sup>. Previous animal  
414 studies support that the function of adaptive gene-brain-cognition feedback systems may be  
415 affected by ELS<sup>8</sup>. Thus, the comprehensive impact of ELS on this triangular relationship  
416 needs to be further investigated in terms of brain function to reveal all the causal  
417 mechanisms. Second, we created composite scores of ELS with several proxy measures  
418 instead of using the established measure for childhood trauma, i.e., the Adverse Childhood  
419 Experiences (ACE) questionnaire<sup>90</sup>. This was mainly due to the unavailability of the ACE  
420 questionnaire data in the ABCD study. However, it is of note that we included questionnaires  
421 similar to those of the ACE questionnaire and included several ELS-related measurements<sup>68</sup>,  
422 thus aggregating various adverse environmental factors.

423

## 424 Acknowledgments

425 This work was supported by the New Faculty Startup Fund from Seoul National  
426 University and a Research grant from Basic Science Research Program through the  
427 National Research Foundation of Korea (NRF) funded by the Ministry of Education, South  
428 Korea (2021R111A1A01054995).

429

## 430 Author contributions

- 431 • Study concept and design: Y.J., J.C.
- 432 • Acquisition, analysis, or interpretation of data: Y.J., H.W., S.M., K.K., H.K.
- 433 • Drafting of the manuscript: Y.J., H.W., S.M., J.C.

- 434
- Critical revision of the manuscript for important intellectual content: Y.J., J.K.,
- 435 H.W. S.M., K.K., W.A.
- 436
- Statistical analysis: H.W., S.M.
- 437
- Obtained funding: J.C.
- 438
- Study supervision: Y.J. J.C.

439

## 440 **Data and Code Availability**

441 Codes and data are freely available for reproducibility  
442 ([https://github.com/Transconnectome/ELS\\_on\\_genes-brain-cognition](https://github.com/Transconnectome/ELS_on_genes-brain-cognition))

443

## 444 **Competing Interest Disclosures**

445 None of the authors have significant competing financial, professional, or personal  
446 interests that might have influenced the performance or presentation of the work  
447 described in the manuscript.

448

## References

- 449 1. Saleh, A. *et al.* Effects of early life stress on depression, cognitive performance and brain  
450 morphology. *Psychol. Med.* **47**, 171–181 (2017).
- 451 2. Pesonen, A.-K. *et al.* Cognitive ability and decline after early life stress exposure.  
452 *Neurobiol. Aging* **34**, 1674–1679 (2013).
- 453 3. Pechtel, P. & Pizzagalli, D. A. Effects of early life stress on cognitive and affective  
454 function: an integrated review of human literature. *Psychopharmacology* **214**, 55–70  
455 (2011).
- 456 4. De Bellis, M. D. Developmental traumatology: the psychobiological development of  
457 maltreated children and its implications for research, treatment, and policy. *Dev.*  
458 *Psychopathol.* **13**, 539–564 (2001).
- 459 5. Peña, C. J. *et al.* Early life stress confers lifelong stress susceptibility in mice via ventral  
460 tegmental area OTX2. *Science* **356**, 1185–1188 (2017).
- 461 6. Niwa, M. *et al.* Adolescent stress-induced epigenetic control of dopaminergic neurons via  
462 glucocorticoids. *Science* **339**, 335–339 (2013).
- 463 7. Fuge, P. *et al.* Interaction of Early Life Stress and Corticotropin-Releasing Hormone  
464 Receptor Gene: Effects on Working Memory. *Biological Psychiatry* vol. 76 888–894  
465 (2014).
- 466 8. Chen, Y. & Baram, T. Z. Toward Understanding How Early-Life Stress Reprograms  
467 Cognitive and Emotional Brain Networks. *Neuropsychopharmacology* **41**, 197–206  
468 (2016).
- 469 9. McGowan, P. O. *et al.* Epigenetic regulation of the glucocorticoid receptor in human  
470 brain associates with childhood abuse. *Nat. Neurosci.* **12**, 342–348 (2009).

- 471 10. Koenen, K. C., Moffitt, T. E., Caspi, A., Taylor, A. & Purcell, S. Domestic violence is  
472 associated with environmental suppression of IQ in young children. *Dev. Psychopathol.*  
473 **15**, 297–311 (2003).
- 474 11. Adjimann, T. S., Argañaraz, C. V. & Soiza-Reilly, M. Serotonin-related rodent models of  
475 early-life exposure relevant for neurodevelopmental vulnerability to psychiatric disorders.  
476 *Transl. Psychiatry* **11**, 280 (2021).
- 477 12. Dong, E., Guidotti, A., Zhang, H. & Pandey, S. C. Prenatal stress leads to chromatin and  
478 synaptic remodeling and excessive alcohol intake comorbid with anxiety-like behaviors in  
479 adult offspring. *Neuropharmacology* **140**, 76–85 (2018).
- 480 13. Ivy, A. S. *et al.* Hippocampal dysfunction and cognitive impairments provoked by chronic  
481 early-life stress involve excessive activation of CRH receptors. *J. Neurosci.* **30**, 13005–  
482 13015 (2010).
- 483 14. Spinelli, S. *et al.* Early-life stress induces long-term morphologic changes in primate  
484 brain. *Arch. Gen. Psychiatry* **66**, 658–665 (2009).
- 485 15. Sun, X., Zhang, Y., Li, X., Liu, X. & Qin, C. Early-Life Neglect Alters Emotional and  
486 Cognitive Behavior in a Sex-Dependent Manner and Reduces Glutamatergic Neuronal  
487 Excitability in the Prefrontal Cortex. *Frontiers in Psychiatry* vol. 11 (2021).
- 488 16. Bock, J., Riedel, A. & Braun, K. Differential changes of metabolic brain activity and  
489 interregional functional coupling in prefronto-limbic pathways during different stress  
490 conditions: functional imaging in freely behaving rodent pups. *Front. Cell. Neurosci.* **6**, 19  
491 (2012).
- 492 17. Molet, J. *et al.* Fragmentation and high entropy of neonatal experience predict  
493 adolescent emotional outcome. *Transl. Psychiatry* **6**, e702 (2016).
- 494 18. Brunson, K. L. *et al.* Mechanisms of late-onset cognitive decline after early-life stress. *J.*  
495 *Neurosci.* **25**, 9328–9338 (2005).

- 496 19. Radley, J. J. *et al.* Repeated stress alters dendritic spine morphology in the rat medial  
497 prefrontal cortex. *J. Comp. Neurol.* **507**, 1141–1150 (2008).
- 498 20. Aisa, B., Tordera, R., Lasheras, B., Del Río, J. & Ramírez, M. J. Cognitive impairment  
499 associated to HPA axis hyperactivity after maternal separation in rats.  
500 *Psychoneuroendocrinology* vol. 32 256–266 (2007).
- 501 21. Alviña, K., Jodeiri Farshbaf, M. & Mondal, A. K. Long term effects of stress on  
502 hippocampal function: Emphasis on early life stress paradigms and potential involvement  
503 of neuropeptide Y. *J. Neurosci. Res.* **99**, 57–66 (2021).
- 504 22. Kronman, H. *et al.* Long-term behavioral and cell-type-specific molecular effects of early  
505 life stress are mediated by H3K79me2 dynamics in medium spiny neurons. *Nat.*  
506 *Neurosci.* **24**, 667–676 (2021).
- 507 23. Arabadzisz, D. *et al.* Primate early life stress leads to long-term mild hippocampal  
508 decreases in corticosteroid receptor expression. *Biol. Psychiatry* **67**, 1106–1109 (2010).
- 509 24. Wang, X.-D. *et al.* Forebrain CRF1 Modulates Early-Life Stress-Programmed Cognitive  
510 Deficits. *Journal of Neuroscience* vol. 31 13625–13634 (2011).
- 511 25. De Bellis, M. D. *et al.* Brain structures in pediatric maltreatment-related posttraumatic  
512 stress disorder: a sociodemographically matched study. *Biol. Psychiatry* **52**, 1066–1078  
513 (2002).
- 514 26. Jackowski, A. P. *et al.* Corpus callosum in maltreated children with posttraumatic stress  
515 disorder: a diffusion tensor imaging study. *Psychiatry Res.* **162**, 256–261 (2008).
- 516 27. Gatt, J. M. *et al.* Interactions between BDNF Val66Met polymorphism and early life  
517 stress predict brain and arousal pathways to syndromal depression and anxiety. *Mol.*  
518 *Psychiatry* **14**, 681–695 (2009).
- 519 28. Caspi, A. *et al.* Influence of life stress on depression: moderation by a polymorphism in  
520 the 5-HTT gene. *Science* **301**, 386–389 (2003).

- 521 29. McLaughlin, K. A. *et al.* Maltreatment Exposure, Brain Structure, and Fear Conditioning  
522 in Children and Adolescents. *Neuropsychopharmacology* **41**, 1956–1964 (2016).
- 523 30. Lee, J. J. *et al.* Gene discovery and polygenic prediction from a genome-wide  
524 association study of educational attainment in 1.1 million individuals. *Nat. Genet.* **50**,  
525 1112–1121 (2018).
- 526 31. van der Sluis, S., Willemsen, G., de Geus, E. J. C., Boomsma, D. I. & Posthuma, D.  
527 Gene-environment interaction in adults' IQ scores: measures of past and present  
528 environment. *Behav. Genet.* **38**, 348–360 (2008).
- 529 32. Harden, K. P., Turkheimer, E. & Loehlin, J. C. Genotype by environment interaction in  
530 adolescents' cognitive aptitude. *Behav. Genet.* **37**, 273–283 (2007).
- 531 33. Plomin, R. & von Stumm, S. The new genetics of intelligence. *Nat. Rev. Genet.* **19**, 148–  
532 159 (2018).
- 533 34. Jernigan, T. & Jernigan, T. Adolescent brain cognitive development study (ABCD) -  
534 annual release 2.0. (2019) doi:10.15154/1503209.
- 535 35. Karcher, N. R. & Barch, D. M. The ABCD study: understanding the development of risk  
536 for mental and physical health outcomes. *Neuropsychopharmacology* **46**, 131–142  
537 (2021).
- 538 36. Das, S. *et al.* Next-generation genotype imputation service and methods. *Nat. Genet.* **48**,  
539 1284–1287 (2016).
- 540 37. Loh, P.-R. *et al.* Reference-based phasing using the Haplotype Reference Consortium  
541 panel. *Nature Genetics* vol. 48 1443–1448 (2016).
- 542 38. Raj, A., Stephens, M. & Pritchard, J. K. fastSTRUCTURE: variational inference of  
543 population structure in large SNP data sets. *Genetics* **197**, 573–589 (2014).



- 544 39. Conomos, M. P., Miller, M. B. & Thornton, T. A. Robust inference of population structure  
545 for ancestry prediction and correction of stratification in the presence of relatedness.  
546 *Genet. Epidemiol.* **39**, 276–293 (2015).
- 547 40. Conomos, M. P., Reiner, A. P., Weir, B. S. & Thornton, T. A. Model-free Estimation of  
548 Recent Genetic Relatedness. *Am. J. Hum. Genet.* **98**, 127–148 (2016).
- 549 41. Choi, S. W. & O'Reilly, P. F. PRSice-2: Polygenic Risk Score software for biobank-scale  
550 data. *Gigascience* **8**, (2019).
- 551 42. Garavan, H. *et al.* Recruiting the ABCD sample: Design considerations and procedures.  
552 *Developmental Cognitive Neuroscience* vol. 32 16–22 (2018).
- 553 43. Casey, B. J. *et al.* The Adolescent Brain Cognitive Development (ABCD) study: Imaging  
554 acquisition across 21 sites. *Developmental Cognitive Neuroscience* vol. 32 43–54 (2018).
- 555 44. Jovicich, J. *et al.* Reliability in multi-site structural MRI studies: effects of gradient non-  
556 linearity correction on phantom and human data. *Neuroimage* **30**, 436–443 (2006).
- 557 45. Dale, A. M., Fischl, B. & Sereno, M. I. Cortical surface-based analysis. I. Segmentation  
558 and surface reconstruction. *Neuroimage* **9**, 179–194 (1999).
- 559 46. Ségonne, F. *et al.* A hybrid approach to the skull stripping problem in MRI. *Neuroimage*  
560 **22**, 1060–1075 (2004).
- 561 47. Fischl, B., Liu, A. & Dale, A. M. Automated manifold surgery: constructing geometrically  
562 accurate and topologically correct models of the human cerebral cortex. *IEEE Trans.*  
563 *Med. Imaging* **20**, 70–80 (2001).
- 564 48. Ségonne, F., Pacheco, J. & Fischl, B. Geometrically accurate topology-correction of  
565 cortical surfaces using nonseparating loops. *IEEE Trans. Med. Imaging* **26**, 518–529  
566 (2007).

- 567 49. Fischl, B., Sereno, M. I., Tootell, R. B. H. & Dale, A. M. High-resolution intersubject  
568 averaging and a coordinate system for the cortical surface. *Human Brain Mapping* vol. 8  
569 272–284 (1999).
- 570 50. Hagler, D. J., Jr *et al.* Image processing and analysis methods for the Adolescent Brain  
571 Cognitive Development Study. *Neuroimage* **202**, 116091 (2019).
- 572 51. Zhuang, J. *et al.* Correction of eddy-current distortions in diffusion tensor images using  
573 the known directions and strengths of diffusion gradients. *J. Magn. Reson. Imaging* **24**,  
574 1188–1193 (2006).
- 575 52. Hagler, D. J. *et al.* Automated white-matter tractography using a probabilistic diffusion  
576 tensor atlas: Application to temporal lobe epilepsy. *Human Brain Mapping* vol. 30 1535–  
577 1547 (2009).
- 578 53. Leemans, A. & Jones, D. K. The B-matrix must be rotated when correcting for subject  
579 motion in DTI data. *Magnetic Resonance in Medicine* vol. 61 1336–1349 (2009).
- 580 54. Chang, L.-C., Jones, D. K. & Pierpaoli, C. RESTORE: robust estimation of tensors by  
581 outlier rejection. *Magn. Reson. Med.* **53**, 1088–1095 (2005).
- 582 55. Holland, D., Kuperman, J. M. & Dale, A. M. Efficient correction of inhomogeneous static  
583 magnetic field-induced distortion in Echo Planar Imaging. *Neuroimage* **50**, 175–183  
584 (2010).
- 585 56. Tournier, J.-D. *et al.* MRtrix3: A fast, flexible and open software framework for medical  
586 image processing and visualisation. *Neuroimage* **202**, 116137 (2019).
- 587 57. Cha, J. *et al.* Abnormal reward circuitry in anorexia nervosa: A longitudinal, multimodal  
588 MRI study. *Hum. Brain Mapp.* **37**, 3835–3846 (2016).
- 589 58. Cha, J. *et al.* Neural Correlates of Aggression in Medication-Naive Children with ADHD:  
590 Multivariate Analysis of Morphometry and Tractography. *Neuropsychopharmacology* **40**,  
591 1717–1725 (2015).

- 592 59. Veraart, J. *et al.* Denoising of diffusion MRI using random matrix theory. *NeuroImage* vol.  
593 142 394–406 (2016).
- 594 60. Tustison, N. J. *et al.* N4ITK: improved N3 bias correction. *IEEE Trans. Med. Imaging* **29**,  
595 1310–1320 (2010).
- 596 61. Ciccarelli, O. *et al.* Probabilistic diffusion tractography: a potential tool to assess the rate  
597 of disease progression in amyotrophic lateral sclerosis. *Brain* **129**, 1859–1871 (2006).
- 598 62. Calamante, F., Tournier, J.-D., Jackson, G. D. & Connelly, A. Track-density imaging  
599 (TDI): super-resolution white matter imaging using whole-brain track-density mapping.  
600 *Neuroimage* **53**, 1233–1243 (2010).
- 601 63. Bedre, R. renebedre/bioinfokit: Bioinformatics data analysis and visualization toolkit.  
602 (2021) doi:10.5281/zenodo.4422035.
- 603 64. Gershon, R. C. *et al.* NIH toolbox for assessment of neurological and behavioral function.  
604 *Neurology* **80**, S2–6 (2013).
- 605 65. Cattell, R. B. Theory of fluid and crystallized intelligence: A critical experiment. *Journal of*  
606 *Educational Psychology* vol. 54 1–22 (1963).
- 607 66. Weintraub, S. *et al.* Cognition assessment using the NIH Toolbox. *Neurology* **80**, S54–64  
608 (2013).
- 609 67. Akshoomoff, N. *et al.* VIII. NIH Toolbox Cognition Battery (CB): composite scores of  
610 crystallized, fluid, and overall cognition. *Monogr. Soc. Res. Child Dev.* **78**, 119–132  
611 (2013).
- 612 68. Hoffman, E. A. *et al.* Stress exposures, neurodevelopment and health measures in the  
613 ABCD study. *Neurobiology of Stress* vol. 10 100157 (2019).
- 614 69. Edwards, J. R. & Lambert, L. S. Methods for integrating moderation and mediation: a  
615 general analytical framework using moderated path analysis. *Psychol. Methods* **12**, 1–22  
616 (2007).

- 617 70. Hayes, A. F. An Index and Test of Linear Moderated Mediation. *Multivariate Behav. Res.*  
618 **50**, 1–22 (2015).
- 619 71. Preacher, K. J., Rucker, D. D. & Hayes, A. F. Addressing Moderated Mediation  
620 Hypotheses: Theory, Methods, and Prescriptions. *Multivariate Behav. Res.* **42**, 185–227  
621 (2007).
- 622 72. Thompson, P. M. *et al.* Genetic influences on brain structure. *Nat. Neurosci.* **4**, 1253–  
623 1258 (2001).
- 624 73. Elliott, M. L. *et al.* A Polygenic Score for Higher Educational Attainment is Associated  
625 with Larger Brains. *Cereb. Cortex* **29**, 3496–3504 (2019).
- 626 74. Mitchell, B. L. *et al.* Educational attainment polygenic scores are associated with cortical  
627 total surface area and regions important for language and memory. *Neuroimage* **212**,  
628 116691 (2020).
- 629 75. Posthuma, D. *et al.* The association between brain volume and intelligence is of genetic  
630 origin. *Nature neuroscience* vol. 5 83–84 (2002).
- 631 76. Pol, H. E. H. *et al.* Genetic Contributions to Human Brain Morphology and Intelligence.  
632 *Journal of Neuroscience* vol. 26 10235–10242 (2006).
- 633 77. van Leeuwen, M. *et al.* A genetic analysis of brain volumes and IQ in children.  
634 *Intelligence* vol. 37 181–191 (2009).
- 635 78. Gogtay, N. *et al.* Dynamic mapping of human cortical development during childhood  
636 through early adulthood. *Proc. Natl. Acad. Sci. U. S. A.* **101**, 8174–8179 (2004).
- 637 79. Belsky, J. Variation in Susceptibility to Environmental Influence: An Evolutionary  
638 Argument. *Psychological Inquiry* vol. 8 182–186 (1997).
- 639 80. Boyce, W. T. & Ellis, B. J. Biological sensitivity to context: I. An evolutionary-  
640 developmental theory of the origins and functions of stress reactivity. *Dev. Psychopathol.*  
641 **17**, 271–301 (2005).

- 642 81. Silveira, P. P. *et al.* Genetic Differential Susceptibility to Socioeconomic Status and  
643 Childhood Obesogenic Behavior: Why Targeted Prevention May Be the Best Societal  
644 Investment. *JAMA Pediatr.* **170**, 359–364 (2016).
- 645 82. Cecil, C. A. M. *et al.* Epigenetic signatures of childhood abuse and neglect: Implications  
646 for psychiatric vulnerability. *J. Psychiatr. Res.* **83**, 184–194 (2016).
- 647 83. Yang, B.-Z. *et al.* Child abuse and epigenetic mechanisms of disease risk. *Am. J. Prev.*  
648 *Med.* **44**, 101–107 (2013).
- 649 84. Labonté, B. *et al.* Genome-wide epigenetic regulation by early-life trauma. *Arch. Gen.*  
650 *Psychiatry* **69**, 722–731 (2012).
- 651 85. Rietveld, C. A. *et al.* GWAS of 126,559 individuals identifies genetic variants associated  
652 with educational attainment. *Science* **340**, 1467–1471 (2013).
- 653 86. Belsky, D. W. *et al.* The Genetics of Success: How Single-Nucleotide Polymorphisms  
654 Associated With Educational Attainment Relate to Life-Course Development. *Psychol.*  
655 *Sci.* **27**, 957–972 (2016).
- 656 87. Demange, P. A. *et al.* Investigating the genetic architecture of noncognitive skills using  
657 GWAS-by-subtraction. *Nat. Genet.* **53**, 35–44 (2021).
- 658 88. Merrifield, P. R. & Cattell, R. B. Abilities: Their Structure, Growth, and Action. *American*  
659 *Educational Research Journal* vol. 12 516 (1975).
- 660 89. Christoforou, A. *et al.* GWAS-based pathway analysis differentiates between fluid and  
661 crystallized intelligence. *Genes Brain Behav.* **13**, 663–674 (2014).
- 662 90. Felitti, V. J. *et al.* Relationship of childhood abuse and household dysfunction to many of  
663 the leading causes of death in adults. The Adverse Childhood Experiences (ACE) Study.  
664 *Am. J. Prev. Med.* **14**, 245–258 (1998).
- 665

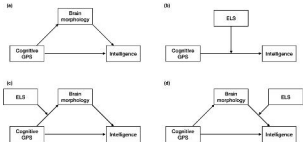

**Figure 1. Schematic overview of the tested path models. (a)** The baseline m

ediation model has the brain factor as a mediator. **(b)** The moderation model has ELS a

s a moderator. **(c)** The first-stage moderated mediation model for testing the moderating

role of ELS on the relationship between the brain and genomic factors. **(c)** The second-

stage moderated mediation model for testing the moderating role of ELS on the relation

ship between the brain and intelligence composite scores.

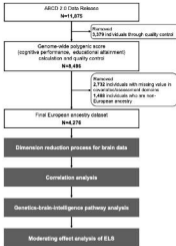

**Figure 2. Flow chart of data selection and research design.** From the ABCD

2.0 Data release, genetic, brain imaging, and cognitive assessment data for 11,875 participants were collected. For the 8,496 individuals after initial quality control and GPS calculation, we additionally removed samples of non-European ancestry or with any missing values, for a total of 4,276 participants included in the analysis.

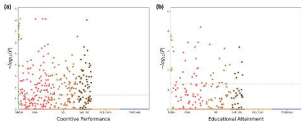

**Figure 3. Manhattan plots of GPS-brain linear regression.** The results of generalized linear models between brain morphometric features and (a) CP GPS and (b) between brain morphometric features and EA GPS are presented using the Bonferroni-corrected  $p$  values. The dotted line indicates the significance threshold ( $P_{FWE} = 0.05$ ). The X-axis is the category of brain features: global features (Global), brain cortical area (Area), cortical volume (Volume), subcortical volume (Sub. Vol.), average cortical curvature (Avg. Curv.), and cortical thickness (Thickness).



(a)

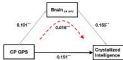

(b)

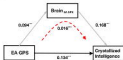

— Direct Effect  
 - - - Indirect Effect

\* $p < 0.05$ , \*\* $p < 0.01$ , \*\*\* $p < 0.001$

**Figure 4. Path diagrams for crystallized intelligence mediation models. Standardized regression coefficients for each path. Red dotted lines indicate the total indirect effect.**

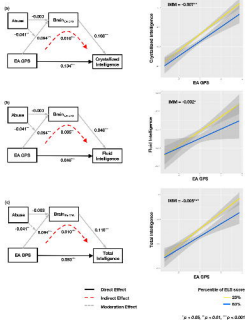

**Figure 5. Effect of abuse on the EA GPS-brain-cognition pathway.** The left panel shows standardized regress

-ion coefficients for each path. Red dotted lines indicate the total indirect effect. Gray dotted lines indicate the moderation effect of ELS on the GPS-brain relationship. The right panel shows differences in the indirect impact caused by composite ELS scores (transparent gray areas indicate confidence intervals).

**Table 1. Demographic characteristics of participants with European ancestry (N=4,276).**

The total participants are divided into five intervals regarding the composite score of ELS.

| Sex           | Number of subjects   |                    |                 |                 |                  |
|---------------|----------------------|--------------------|-----------------|-----------------|------------------|
|               | male                 | 2,271              |                 |                 |                  |
| female        | 2,005                |                    |                 |                 |                  |
| Age (control) | Mean                 | Standard deviation |                 |                 |                  |
|               | 129.28               | 7.38               |                 |                 |                  |
| ELS score     | 0-20% (female)       | 20-40% (female)    | 40-60% (female) | 60-80% (female) | 80-100% (female) |
|               | Household Challenges | 3711 (46.7%)       | 464 (48.7%)     | 88 (47.0%)      | 25 (40.0%)       |
| Neglect       | 2508 (51.7%)         | 1903 (41.8%)       | 377 (34.2%)     | 81 (40.7%)      | 6 (33.3%)        |
| Abuse         | 4333 (40.8%)         | 27 (35.6%)         | 1 (100.0%)      | 0 (0)           | 13 (30.8%)       |

Demographic characteristics of participants regarding the composite score of ELS subscales are listed in supplementary table 4.

**Table 2. Results of mediation analysis**

| Intelligence type                                 | Crystallized intelligence  |                            | Fluid intelligence         |                            | Total intelligence         |                            |
|---------------------------------------------------|----------------------------|----------------------------|----------------------------|----------------------------|----------------------------|----------------------------|
|                                                   | CP-GPS                     | IA-GPS                     | CP-GPS                     | IA-GPS                     | CP-GPS                     | IA-GPS                     |
| <b>coefficient</b><br>( <i>beta</i> , <i>ci</i> ) |                            |                            |                            |                            |                            |                            |
| X → M                                             | 0.101***<br>(0.075, 0.128) | 0.094***<br>(0.068, 0.122) | 0.101***<br>(0.075, 0.128) | 0.081***<br>(0.055, 0.104) | 0.100***<br>(0.075, 0.125) | 0.094***<br>(0.067, 0.122) |
| M → Y                                             | 0.155***<br>(0.119, 0.191) | 0.188***<br>(0.149, 0.188) | 0.041***<br>(0.012, 0.071) | 0.059***<br>(0.029, 0.078) | 0.095***<br>(0.071, 0.117) | 0.110***<br>(0.082, 0.138) |
| X → M → Y<br>(indirect)                           | 0.016***<br>(0.011, 0.021) | 0.056***<br>(0.033, 0.051) | 0.004***<br>(0.001, 0.008) | 0.009***<br>(0.001, 0.008) | 0.010***<br>(0.007, 0.014) | 0.010***<br>(0.007, 0.014) |
| X → Y<br>(direct)                                 | 0.151***<br>(0.116, 0.173) | 0.134***<br>(0.102, 0.163) | 0.087***<br>(0.061, 0.113) | 0.035*<br>(0.017, 0.074)   | 0.130***<br>(0.103, 0.152) | 0.093***<br>(0.067, 0.118) |
| <b>R<sup>2</sup></b>                              |                            |                            |                            |                            |                            |                            |
| X → M                                             | 0.288                      | 0.279                      | 0.288                      | 0.279                      | 0.288                      | 0.279                      |
| X → Y                                             | 0.252                      | 0.243                      | 0.247                      | 0.140                      | 0.248                      | 0.236                      |

Family Wise Error corrected *p* values. \* *p* < 0.05, \*\* *p* < 0.01, \*\*\**p* < 0.001. Standardized regression coefficients for each path and standardized regression coefficients for indirect/direct path are reported. 95% confidence intervals are listed in the square brackets at below coefficient values. CP-GPS – Cognitive Performance-GPS; IA-GPS – Educational Attainment-GPS. X [Independent variable] – GPS; M [Mediator] – the first principal component of GPS-related brain morphology features; Brain; Y [Dependent variable] – Intelligence Composite Score. Note: N = 4,767.

**Table 3. Moderated Mediation effect of Abuse on Educational Attainment GPS-Brain-Cognition**

| Intelligence                 | Crystallized Intelligence              | Fluid Intelligence                     | Total Intelligence                        |
|------------------------------|----------------------------------------|----------------------------------------|-------------------------------------------|
| <b>coefficient (95% CI)</b>  |                                        |                                        |                                           |
| X → M                        | 0.094 <sup>***</sup><br>(0.065, 0.123) | 0.094 <sup>***</sup><br>(0.065, 0.123) | 0.094 <sup>***</sup><br>(0.065, 0.123)    |
| W → M                        | -0.009<br>(-0.07, 0.051)               | -0.009<br>(-0.071, 0.051)              | -0.009<br>(-0.071, 0.051)                 |
| X*W → M                      | 0.041 <sup>**</sup><br>(0.009, 0.073)  | 0.041 <sup>**</sup><br>(0.009, 0.073)  | 0.041 <sup>**</sup><br>(0.009, 0.073)     |
| M → Y                        | 0.138 <sup>***</sup><br>(0.109, 0.167) | 0.049 <sup>***</sup><br>(0.017, 0.079) | 0.150 <sup>***</sup><br>(0.121, 0.179)    |
| X → M → Y (Indirect)         | 0.006 <sup>***</sup><br>(0.001, 0.009) | 0.006 <sup>***</sup><br>(0.001, 0.009) | 0.006 <sup>***</sup><br>(0.001, 0.009)    |
| X → Y (Direct)               | 0.134 <sup>***</sup><br>(0.105, 0.163) | 0.046 <sup>***</sup><br>(0.014, 0.077) | 0.093 <sup>***</sup><br>(0.064, 0.122)    |
| Indirect Moderated Mediation | 0.007 <sup>***</sup><br>(0.002, 0.009) | -0.007 <sup>*</sup><br>(-0.014, 0.001) | -0.003 <sup>***</sup><br>(-0.005, -0.001) |
| <b>R<sup>2</sup></b>         |                                        |                                        |                                           |
| X & W → M                    | 0.281                                  | 0.281                                  | 0.281                                     |
| X & Y                        | 0.242                                  | 0.140                                  | 0.230                                     |

Family-Wise Error corrected *p*-values: \* *p* < 0.05, \*\* *p* < 0.01, \*\*\* *p* < 0.001. Standardized regression coefficients for each path and its related regression coefficients for indirect/direct path are reported. X (Independent variable) = Educational Attainment GPS; M (Mediator) = the first principal component of Educational Attainment GPS-related brain morphology (Volume, Area,  $\pi$ ) (dependent variable) = Intelligence Scores; W (Moderator) = Early Life Stress; X\*W = interaction term of GPS and ELS. Note: N = 4,376. Significant full paths: case / control = 4,398 / 76; neglect / control = 3,958 / 716; abuse / control = 1,303 / 2,975.
